# Supplementary material for: Surface species in direct liquid phase synthesis of dimethyl carbonate from methanol and CO2: an MCR-ALS augmented ATR-IR study
Source: Royal Society of Chemistry journal article supplement (doi:10.1039/d2cp05800f), 2023-01-01
Supplement: d2cp05800f1.pdf [file d2cp05800f1.pdf]

## ELECTRONIC SUPPLEMENTARY INFORMATION (ESI) FOR

# Surface species in direct liquid phase synthesis of dimethyl carbonate from methanol and CO<sub>2</sub>: an MCR-ALS augmented ATR-IR study

Matteo Signorile<sup>a\*</sup>, Davide Salusso<sup>a</sup>, Valentina Crocellà<sup>a</sup>, Maria Cristina Paganini<sup>a</sup>, Silvia Bordiga<sup>a</sup>, Francesca Bonino<sup>a</sup>, Davide Ferri<sup>b</sup>

<sup>a</sup> Dipartimento di Chimica, NIS e INSTM, Università di Torino, Via P. Giuria 7, I-10125 Torino and Via G. Quarello 15/A, I-10135 Torino, Italy

<sup>b</sup> Paul Scherrer Institut, CH-5232 Villigen, Switzerland

\* E-Mail: [matteo.signorile@unito.it](mailto:matteo.signorile@unito.it)

|                                                                                        |    |
|----------------------------------------------------------------------------------------|----|
| S1. Literature trend on DMC synthesis over ZrO <sub>2</sub> and CeO <sub>2</sub> ..... | S2 |
| S2. Rietveld refinement of PXRD data .....                                             | S3 |
| S3. Volumetric adsorption of N <sub>2</sub> at 77K .....                               | S4 |
| S4. Reagents feeding setup schematic .....                                             | S5 |
| S5. Transmission IR .....                                                              | S6 |
| S6. MCR-ALS including DMC as sixth component .....                                     | S8 |
| References .....                                                                       | S9 |

### S1. Literature trend on DMC synthesis over $ZrO_2$ and $CeO_2$

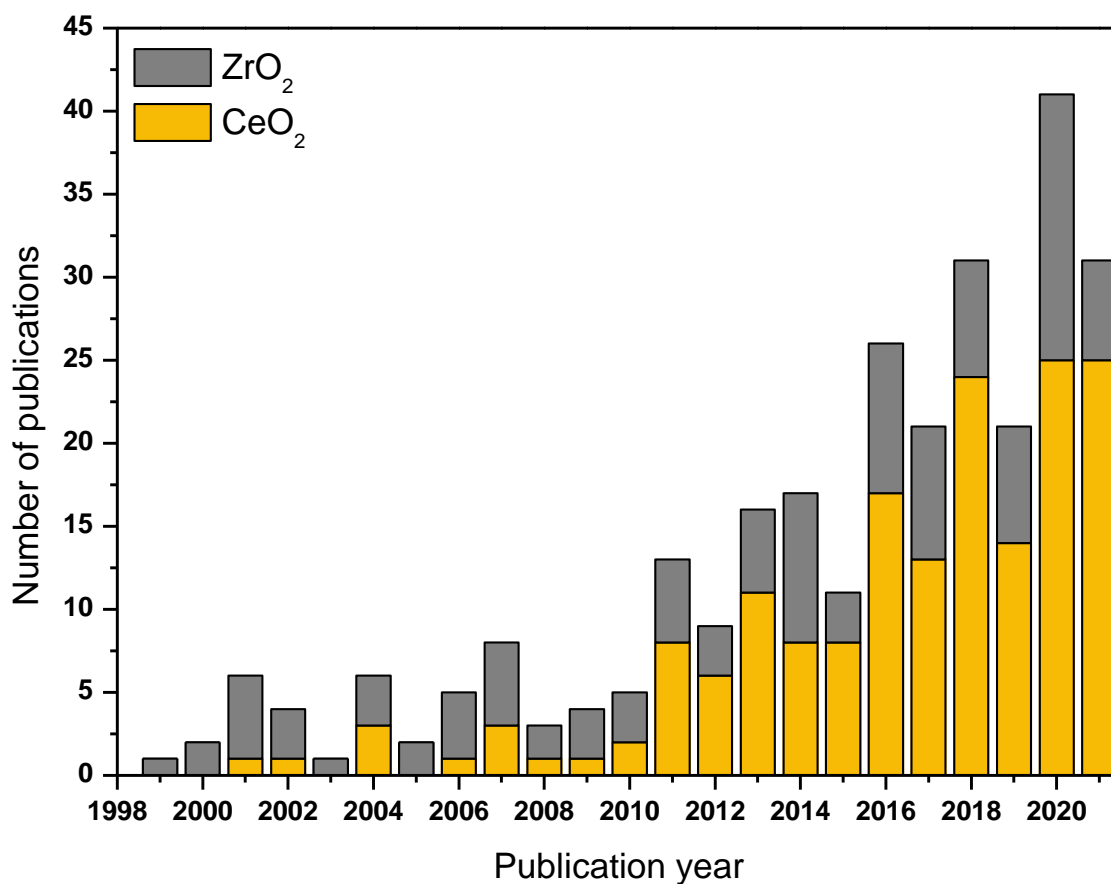

Figure S1. Publications/year distribution related to DMC production from  $CO_2$  and  $CH_3OH$  over  $CeO_2$  and  $ZrO_2$  catalysts.<sup>1</sup>

## S2. Rietveld refinement of PXRD data

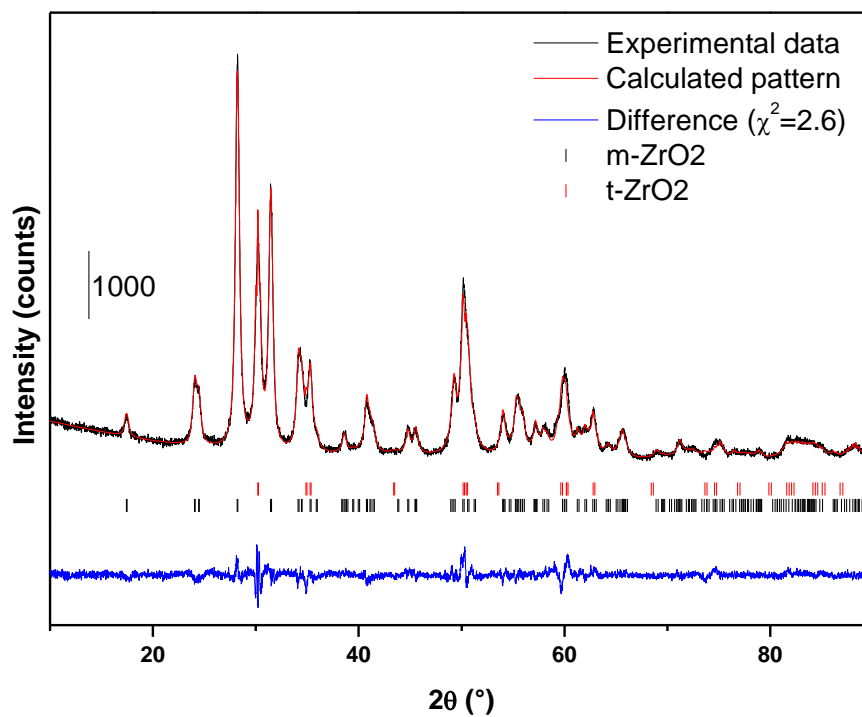

Figure S2. Experimental and refined PXRD patterns of the ZrO<sub>2</sub> catalyst. Bragg reflections of monoclinic (m-ZrO<sub>2</sub>) and tetragonal (t-ZrO<sub>2</sub>) phases are indicated.

### S3. Volumetric adsorption of N<sub>2</sub> at 77K

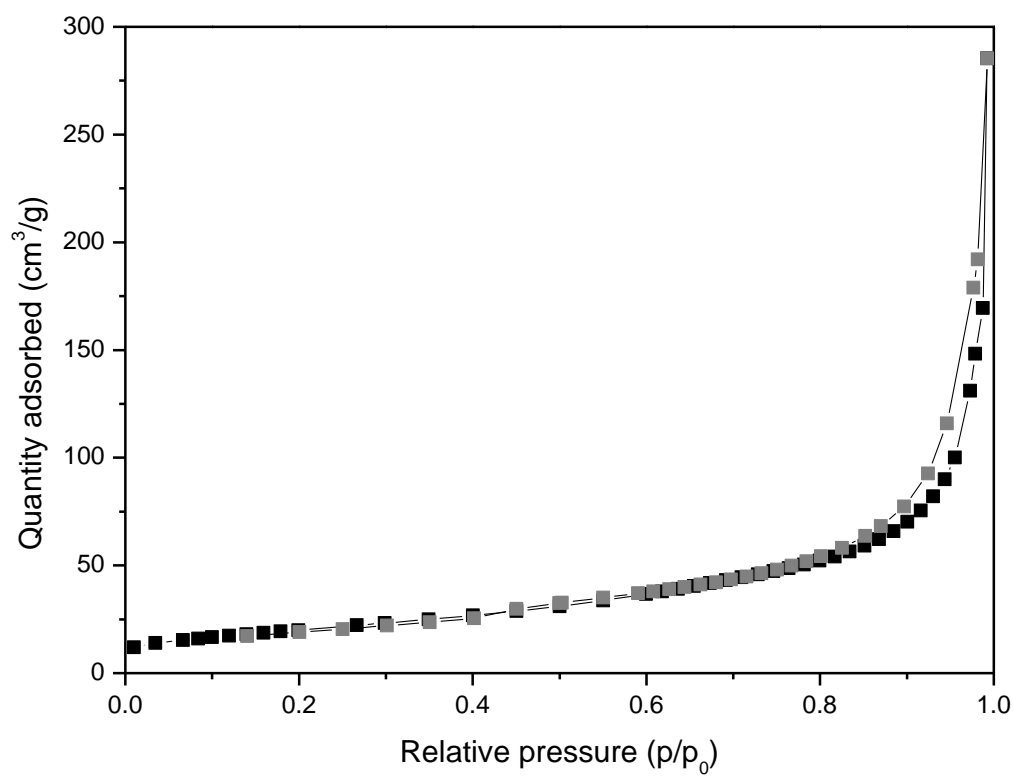

Figure S3. Adsorption (black) and desorption (gray) isotherms of N<sub>2</sub> at 77 K.

#### S4. Reagents feeding setup schematic

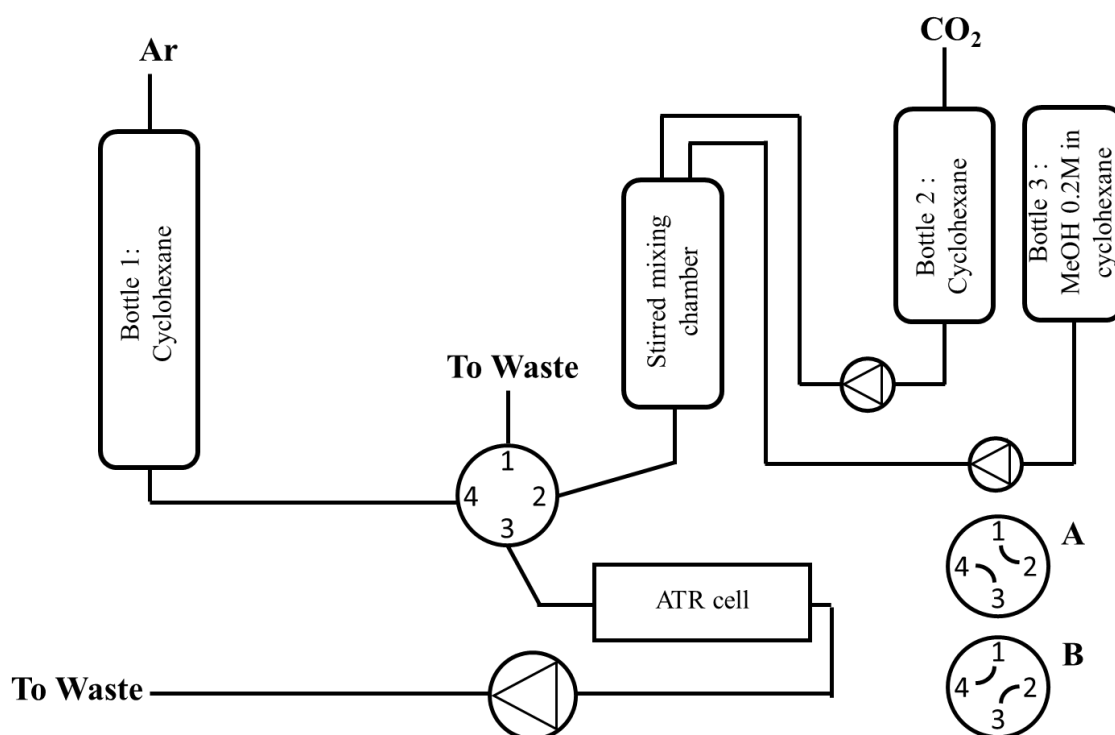

Figure S4. Schematic of the ATR-IR experimental set-up. The two possible positions for the 4-way valve (A and B) are indicated.

## S5. Transmission IR

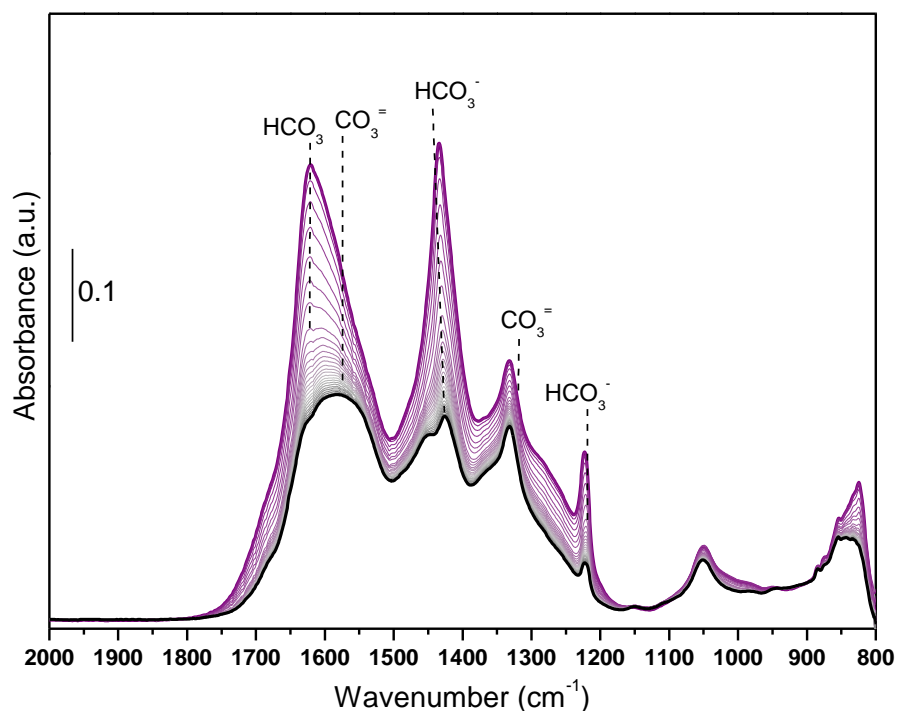

Figure S5. Transmission IR spectra of CO<sub>2</sub> adsorbed over ZrO<sub>2</sub>. CO<sub>2</sub> partial pressure decreases from the purple (80 mbar) to the black (<5 × 10<sup>-4</sup> mbar) curve. Bands were assigned according to the literature.<sup>2,3</sup>

Adsorption of 80 mbar of CO<sub>2</sub> over clean ZrO<sub>2</sub> surface (Figure S5) showed formation of carbonates and bicarbonates species. The formed species and their relative intensities ratio are well reported in the literature and associated to carbonates/bicarbonates formed over ZrO<sub>2</sub> monoclinic polymorph. During desorption, we observed a different kinetic between carbonates and bicarbonates bands. In fact, the latter presented a faster desorption kinetic, typical of weakly bonded species, whilst the former were more stable during desorption.<sup>2,3</sup>

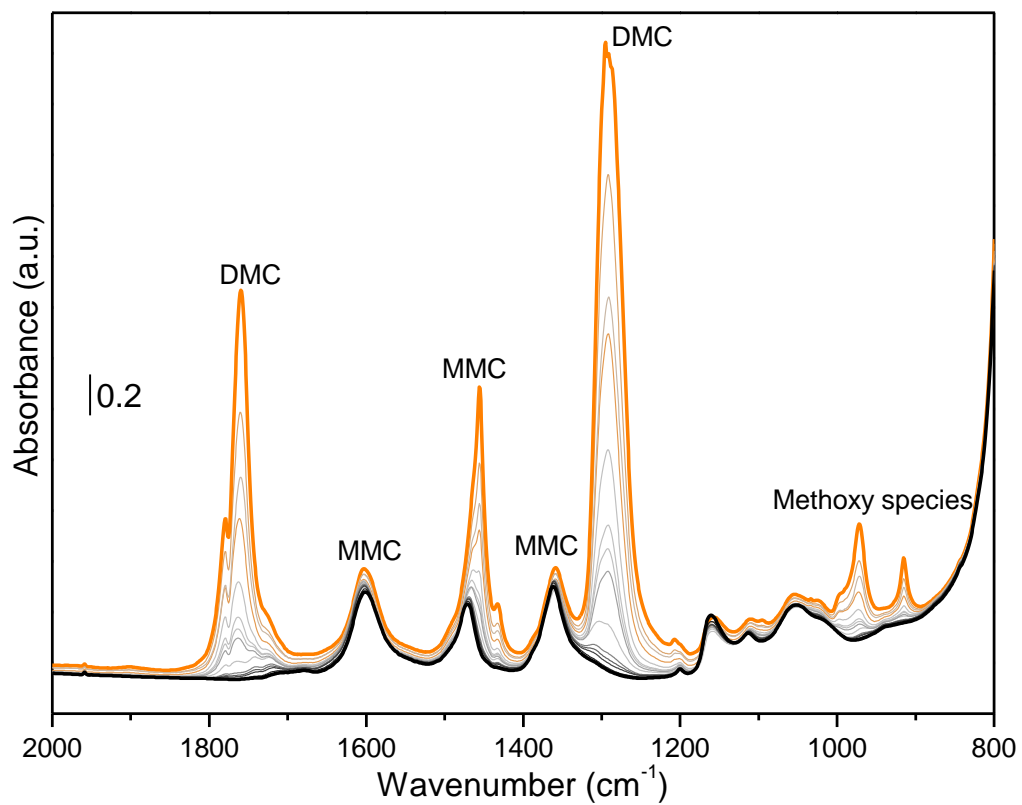

Figure S6. Transmission IR spectra of DMC adsorbed over ZrO<sub>2</sub>. DMC partial pressure increases from the black (44 mbar) to the orange curve. Formation of monomethyl carbonate (MMC) is observed.<sup>4</sup>

## S6. MCR-ALS including DMC as sixth component

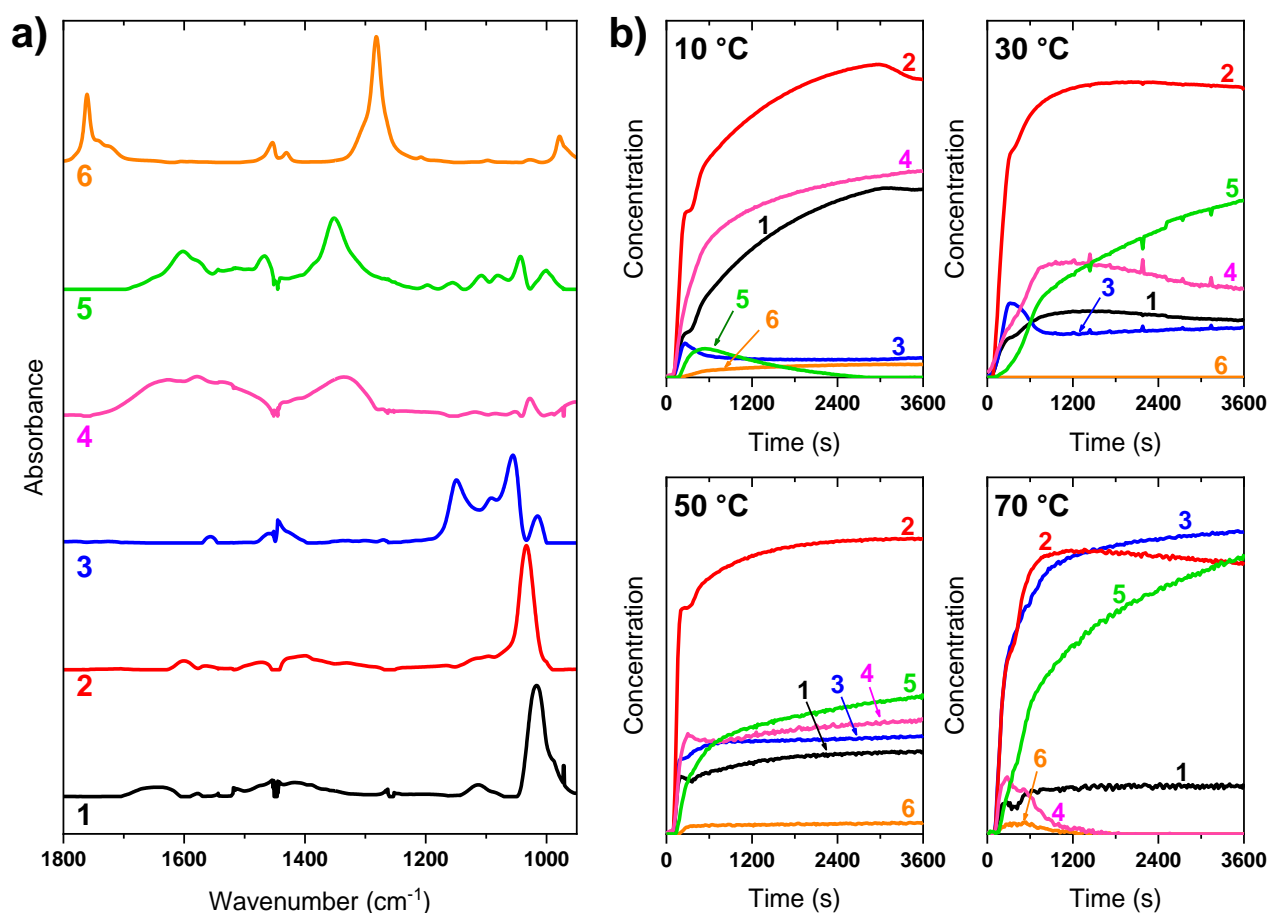

Figure S7. a) Spectra of pure components and b) their concentration profiles obtained from MCR-ALS for reactivity experiments carried out at different temperatures. MCR-ALS has been performed on all the datasets collected at different temperatures simultaneously. The spectrum of DMC adsorbed on ZrO<sub>2</sub> was included in the dataset, and six components were optimized by the algorithm.

The introduction of a sixth component in the MCR-ALS analysis aimed at attempting to include the spectral contribution due to DMC, weakly interacting with the ZrO<sub>2</sub> surface, is shown in Figure S7.

The component **6**, representative for adsorbed DMC, has a very low concentration compared to most of other components, regardless of the reaction temperature. This is not surprising since i) the DMC yield is expected to be very low, also keeping in mind that the experimental conditions adopted here are not optimal for reaching the maximal DMC productivity (however not exceeding 1% at 160 °C under 50 bar of CO<sub>2</sub>);<sup>5</sup> and ii) the interaction of DMC with the surface is expected to be weak and



most of the surface sites are already strongly bound by carbonates/methoxides/MMC. Nonetheless, some inconsistencies are observed, in particular the remarkable concentration of DMC at 10 °C compared to higher temperatures, where the catalytic activity should be superior. The complete absence of DMC at 30 °C is also difficult to explain. Possibly, the concentration of component **6** derived by MCR-ALS is not reliable as a consequence of the very low amount of DMC produced in the experiment.

## References

- 1 Citation Report graphic, source: <https://www.webofscience.com/>, (accessed 28 April 2022).
- 2 B. Bachiller-Baeza, I. Rodriguez-Ramos and A. Guerrero-Ruiz, Interaction of carbon dioxide with the surface of zirconia polymorphs, *Langmuir*, 1998, **14**, 3556–3564.
- 3 K. Pokrovski, K. T. Jung and A. T. Bell, Investigation of CO and CO<sub>2</sub> adsorption on tetragonal and monoclinic zirconia, *Langmuir*, 2001, **17**, 4297–4303.
- 4 K. Taek Jung and A. T. Bell, An in situ infrared study of dimethyl carbonate synthesis from carbon dioxide and methanol over zirconia, *J. Catal.*, 2001, **204**, 339–347.
- 5 B. A. V. Santos, C. S. M. Pereira, V. M. T. M. Silva, J. M. Loureiro and A. E. Rodrigues, Kinetic study for the direct synthesis of dimethyl carbonate from methanol and CO<sub>2</sub> over CeO<sub>2</sub> at high pressure conditions, *Appl. Catal. A Gen.*, 2013, **455**, 219–226.
